# Supplementary material for: Facile preparation of CaCO3 nanocrystals with unique morphologies controlled by supramolecular complexes
Source: Royal Society of Chemistry journal article supplement (doi:10.1039/c1ce05835e), 2011-01-01
Supplement: c1ce05835e.pdf [file c1ce05835e.pdf]

## Supporting information

### **Facile preparation of CaCO<sub>3</sub> nanocrystals with unique morphologies controlled by supramolecular complexes**

**Han Jia, Xiang-Tao Bai, and Li-Qiang Zheng\***

*Key Laboratory of Colloid and Interface Chemistry, Shandong University, Ministry of  
Education, Jinan, 250100, China.*

Tel.: +86 531 88366062

Fax: +86 531 88564750

E-mail address: [lqzheng@sdu.edu.cn](mailto:lqzheng@sdu.edu.cn)

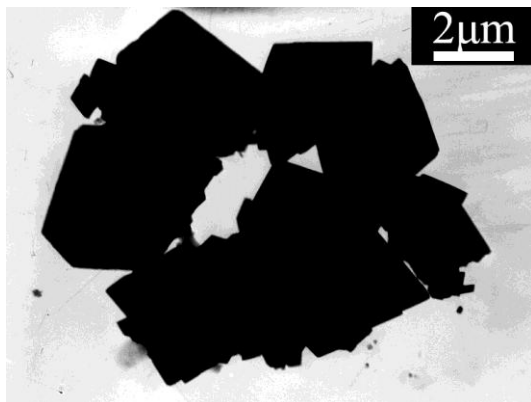

Figure S1. TEM image of CaCO<sub>3</sub> nanostructures obtained in the absence of DTAB when the concentration of  $\beta$ -CD was 1.0 mM.

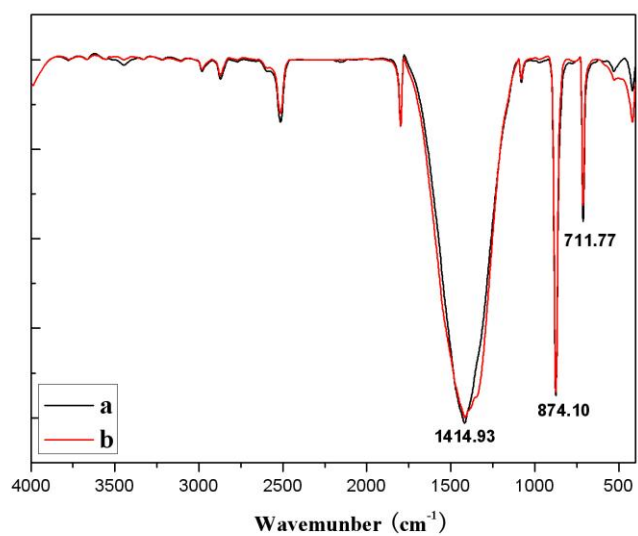

Figure S2. FTIR spectra recorded from the CaCO<sub>3</sub> nanocrystals used as the reference (curve a) and the CaCO<sub>3</sub> nanostructures shown in Figure 1C (curve b).

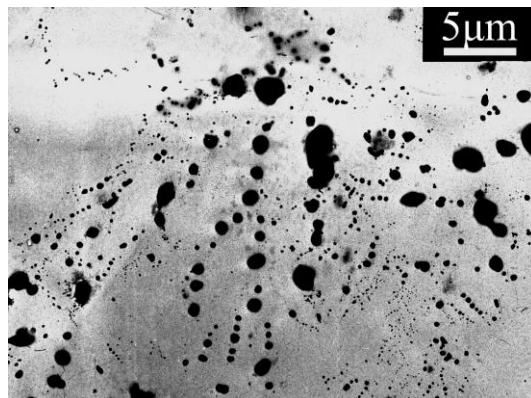

Figure S3. TEM image of CaCO<sub>3</sub> nanostructures obtained without initial incubation of the β-CD/DTAB solution. [DTAB] = 1.0 mM; [β-CD] = 1.0 mM.

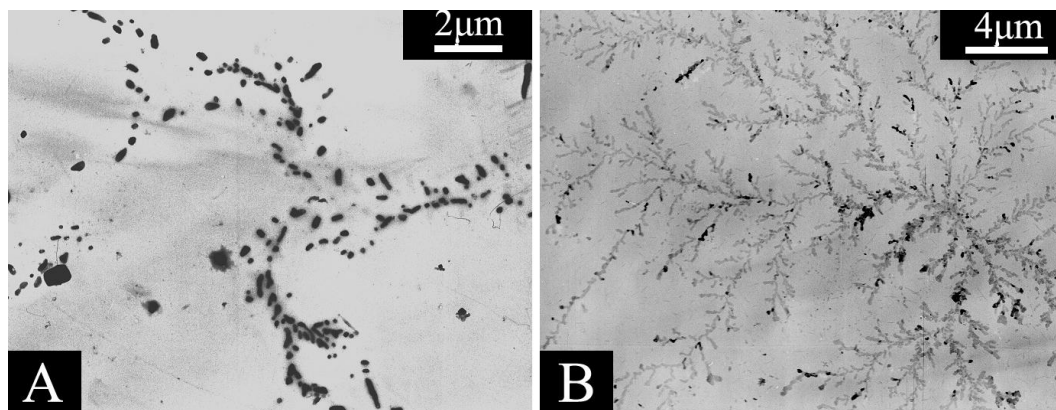

Figure S4. TEM images of  $\text{CaCO}_3$  products obtained in mixed  $\beta$ -CD/DTAB solutions at various DTAB concentrations when the molar ratio of  $\beta$ -CD-to-DTAB was 1.0. [DTAB]: (A) 0.5 mM; (B) 5.0 mM.

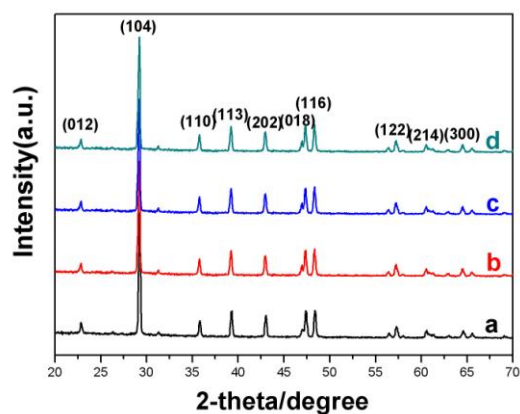

Figure S5. XRD patterns characteristics of the CaCO<sub>3</sub> crystals obtained in C<sub>12</sub>minBr (A), mixed  $\beta$ -CD/C<sub>12</sub>minBr (B), DDAB (C), and mixed  $\beta$ -CD/DDAB (D) solutions. [C<sub>12</sub>minBr] = 1.0 mM, [ $\beta$ -CD]/[C<sub>12</sub>minBr] = 1.0; [DDAB] = 1.0 mM, [ $\beta$ -CD]/[DDAB] = 1.0.

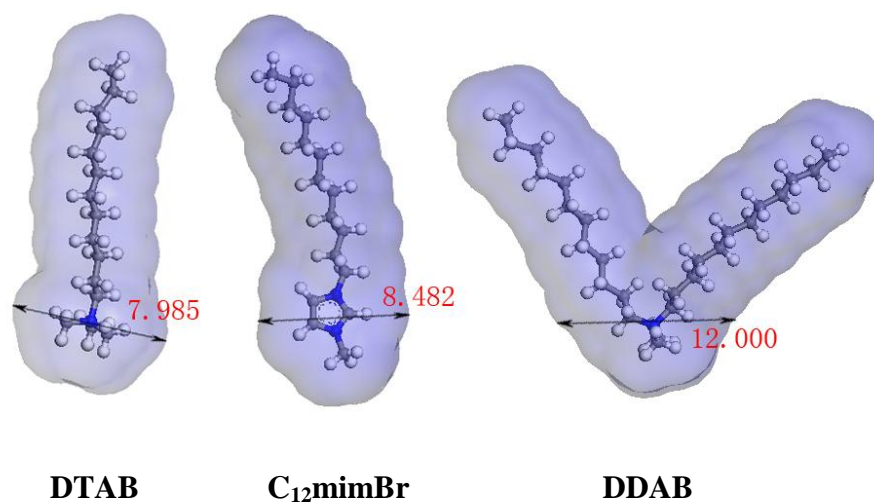

Figure S6. Optimized conformers of the three surfactants.

In order to further reflect the influence of the steric effects, the Connolly surface [S1] was calculated to show the approximate values of sectional area using a water molecule (as a sphere of radius 1.4 Å) as the probe. From the calculation, the diameters of the hydrophilic head are obtained, which are shown in Fig.S6.

### References

[S1] (a) S. M. Yuan, H. Yan, K. Lv, C. B. Liu and S. L. Yuan, *J. Colloid Interface Sci.* 2010, **348**, 159. (b) M. L. Connolly, *Science* 1983, **221**, 709.
